# Supplementary material for: Coupling of HO x , NO x and halogen chemistry in the antarctic boundary layer
Source: Copernicus journal article supplement (doi:10.5194/acp-10-10187-2010), 2010-11-01
Supplement: Supplementary file 1 [file acp-10-10187-2010-supplement.pdf]

2

3 **Supplementary Information**

4

5

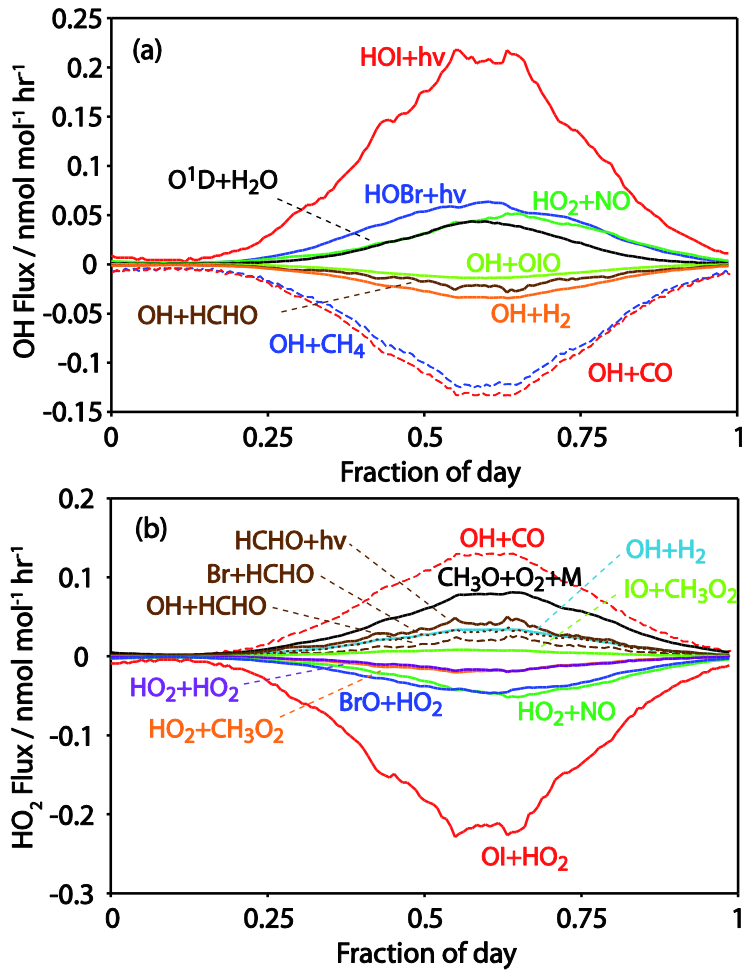

6

7

8 Supplementary Figure 1. OH and HO<sub>2</sub> production / removal fluxes for the B2 scenario

9

10

1 Supplementary Table S1. Photolysis frequencies for halogen species

2

| Reaction                             | Quantum Yield Note                                                       | Mean $j(x) / j(\text{NO}_2)$ | Cross sections / Qm yields used        | Note |
|--------------------------------------|--------------------------------------------------------------------------|------------------------------|----------------------------------------|------|
| $\text{I}_2 + \text{h}\nu$           |                                                                          | 20.3                         | Atkinson et al., 2007                  |      |
| $\text{Br}_2 + \text{h}\nu$          |                                                                          | 3.45                         | Atkinson et al., 2007                  |      |
| $\text{IBr} + \text{h}\nu$           |                                                                          | 9.10                         | Atkinson et al., 2007                  |      |
| $\text{BrO} + \text{h}\nu$           |                                                                          | 5.41                         | Atkinson et al., 2007                  |      |
| $\text{BrONO}_2 + \text{h}\nu$       | $\Phi(\text{Br}+\text{NO}_3) = 1$                                        | 0.160                        | Atkinson et al., 2007                  |      |
| $\text{BrONO} + \text{h}\nu$         | $\Phi(\text{Br}+\text{NO}_2) = 0.5$ , $\Phi(\text{BrO}+\text{NO}) = 0.5$ | 2.28                         | Atkinson et al., 2007                  | 1    |
| $\text{HOBr} + \text{h}\nu$          |                                                                          | 0.256                        | Atkinson et al., 2007                  |      |
| $\text{IO} + \text{h}\nu$            |                                                                          | 18.3                         | Bloss et al., 2001                     |      |
| $\text{OIO} + \text{h}\nu$           | $\Phi(\text{I}+\text{O}_2) = 0.05$                                       | 51.6                         | Cox et al., 1999 / Joseph et al., 2005 | 2    |
| $\text{IONO}_2 + \text{h}\nu$        | $\Phi(\text{I}+\text{NO}_3) = 1$                                         | 0.556                        | Joseph and Plane, 2007                 | 3    |
| $\text{I}_2\text{O}_2 + \text{h}\nu$ | $\Phi(\text{IO}) = 2$                                                    | 0.556                        |                                        | 4    |
| $\text{I}_2\text{O}_3 + \text{h}\nu$ | $\Phi(\text{IO}+\text{OIO}) = 1.0$                                       | 0.556                        |                                        | 4    |
| $\text{I}_2\text{O}_4 + \text{h}\nu$ | $\Phi(\text{OIO}+\text{OIO}) = 1.0$                                      | 0.556                        |                                        | 4    |
| $\text{INO}_2 + \text{h}\nu$         | $\Phi(\text{I}+\text{NO}_2) = 1$                                         | 0.319                        | Sander et al., 2006                    |      |
| $\text{INO} + \text{h}\nu$           |                                                                          | 3.71                         | Sander et al., 2006                    |      |
| $\text{HOI} + \text{h}\nu$           |                                                                          | 1.12                         | Atkinson et al., 2007                  |      |
| $\text{HI} + \text{h}\nu$            |                                                                          | $6.89 \times 10^{-3}$        | Atkinson et al., 2007                  |      |

3 Atkinson et al., 2007 = 2007 IUPAC Evaluation; Sander et al., 2006 = NASA/JPL Evaluation 15-06.

4

5 1: Quantum yield for BrONO photolysis assumed to be 50 % for each channel (Atkinson et  
6 al., 2007).

7 2: OIO absorption spectrum from Cox et al. (1999) scaled to match 567 nm cross section  
8 determined by Joseph et al. (2005). Quantum yield for photolysis assumed to be 5 %  
9 yielding entirely  $\text{I} + \text{O}_2$  following Joseph et al. (2005) and Tucceri et al. (2006); the effect of  
10 increasing the quantum yield for production of  $\text{I} + \text{O}_2$  to unity, as recently reported by  
11 Gómez-Martin et al. (2009), was considered in the sensitivity study.

12 3:  $\text{IONO}_2$  cross sections have been reported by Mossinger et al. (2002) and by Joseph et al.  
13 (2007). The latter data are significantly smaller at long ( $> 360$  nm) wavelengths,  
14 corresponding to roughly one order of magnitude difference in photolysis rate. The more  
15 recent values of Joseph and Plane, taken from the table within their paper, are used here,  
16 with unit photolysis yield of  $\text{I} + \text{NO}_3$  adopted; the magnitude of the  $\text{IONO}_2$  cross sections is  
17 considered in the sensitivity study.

18 4: Definitive cross-sections are not available for  $\text{I}_2\text{O}_2$ ,  $\text{I}_2\text{O}_3$  or  $\text{I}_2\text{O}_4$ . Following the laboratory  
19 estimates of Bloss et al. (2001) and Gómez-Martín et al. (2005), and *ab initio* results  
20 (Kaltsoyannis and Plane, 2008) we assume the absorption spectrum is equal to that of  $\text{IONO}_2$   
21 – this corresponds to a midday photolysis frequency of  $8 \times 10^{-3} \text{ s}^{-1}$  for these species

1 (corresponding  $j(\text{NO}_2) = 1.85 \times 10^{-2} \text{ s}^{-1}$ ). The sensitivity of the model results to this  
 2 assumption is evaluated in the sensitivity study section.

3 Supplementary Table S2. Halogen Scheme: Gas-Phase Kinetic Parameters

4

| Reaction                                                                             | Rate Expression                                                                                             | Reference                                | Note |
|--------------------------------------------------------------------------------------|-------------------------------------------------------------------------------------------------------------|------------------------------------------|------|
| $\text{Br} + \text{O}_3 \rightarrow \text{BrO} + \text{O}_2$                         | $k = 1.7 \times 10^{-11} \exp(-800/T)$                                                                      | Atkinson et al., 2007                    |      |
| $\text{Br} + \text{HO}_2 \rightarrow \text{HBr} + \text{O}_2$                        | $k = 7.7 \times 10^{-13} \exp(-450/T)$                                                                      | Atkinson et al., 2007                    |      |
| $\text{OH} + \text{HBr} \rightarrow \text{Br} + \text{H}_2\text{O}$                  | $k = 6.7 \times 10^{-12} \exp(155/T)$                                                                       | Atkinson et al., 2007                    |      |
| $\text{OH} + \text{Br}_2 \rightarrow \text{HOBr} + \text{Br}$                        | $k = 2.0 \times 10^{-11} \exp(240/T)$                                                                       | Atkinson et al., 2007                    |      |
| $\text{Br} + \text{HCHO} \rightarrow \text{HBr} + \text{HCO}$                        | $k = 7.7 \times 10^{-12} \exp(-580/T)$                                                                      | Atkinson et al., 2007                    |      |
| $\text{Br} + \text{CH}_3\text{CHO} \rightarrow \text{HBr} + \text{CH}_3\text{CO}$    | $k = 1.8 \times 10^{-11} \exp(-460/T)$                                                                      | Atkinson et al., 2007                    |      |
| $\text{Br} + \text{NO}_2 \rightarrow \text{BrONO}$                                   | $k_0 = 4.2 \times 10^{-31} (T/300)^{-2.4}$<br>$k_\infty = 2.7 \times 10^{-11}$ , $F_c = 0.6$                | Sander et al., 2006                      |      |
| $\text{BrO} + \text{BrO} \rightarrow \text{Br} + \text{Br} + \text{O}_2$             | $k = 2.7 \times 10^{-12}$                                                                                   | Atkinson et al., 2007                    |      |
| $\text{BrO} + \text{BrO} \rightarrow \text{Br}_2 + \text{O}_2$                       | $k = 2.9 \times 10^{-14} \exp(840/T)$                                                                       | Atkinson et al., 2007                    |      |
| $\text{BrO} + \text{HO}_2 \rightarrow \text{HOBr} + \text{O}_2$                      | $k = 4.5 \times 10^{-12} \exp(500/T)$                                                                       | Atkinson et al., 2007                    |      |
| $\text{OH} + \text{HOBr} \rightarrow \text{H}_2\text{O} + \text{BrO}$                | $k = 5.0 \times 10^{-11}$                                                                                   |                                          | 1    |
| $\text{BrO} + \text{CH}_3\text{O}_2 \rightarrow \text{HOBr} + \text{CH}_2\text{O}_2$ | $k = 4.6 \times 10^{-13} \exp(798/T)$                                                                       | Enami et al., 2007 / Aranda et al., 1997 | 2    |
| $\text{BrO} + \text{NO} \rightarrow \text{Br} + \text{NO}_2$                         | $k = 8.7 \times 10^{-12} \exp(260/T)$                                                                       | Atkinson et al., 2007                    |      |
| $\text{BrO} + \text{NO}_2 \rightarrow \text{BrONO}_2$                                | $k_0 = 5.2 \times 10^{-31} (T/300)^{-3.2}$<br>$k_\infty = 6.9 \times 10^{-12} (T/300)^{-2.9}$ , $F_c = 0.6$ | Sander et al., 2006                      |      |
| $\text{BrONO}_2 \rightarrow \text{BrO} + \text{NO}_2$                                | $k = 2.8 \times 10^{13} \exp(-12360/T)$                                                                     | Orlando and Tyndall, 1996                |      |
| $\text{I} + \text{O}_3 \rightarrow \text{IO} + \text{O}_2$                           | $k = 2.1 \times 10^{-11} \exp(-830/T)$                                                                      | Atkinson et al., 2007                    |      |
| $\text{I} + \text{HO}_2 \rightarrow \text{HI} + \text{O}_2$                          | $k = 1.5 \times 10^{-11} \exp(-1090/T)$                                                                     | Atkinson et al., 2007                    |      |
| $\text{OH} + \text{HI} \rightarrow \text{I} + \text{H}_2\text{O}$                    | $k = 1.6 \times 10^{-11} \exp(440/T)$                                                                       | Atkinson et al., 2007                    |      |
| $\text{OH} + \text{I}_2 \rightarrow \text{HOI} + \text{I}$                           | $k = 2.1 \times 10^{-10}$                                                                                   | Atkinson et al., 2007                    |      |
| $\text{NO}_3 + \text{I}_2 \rightarrow \text{I} + \text{IONO}_2$                      | $k = 1.5 \times 10^{-12}$                                                                                   | Atkinson et al., 2007                    | 3    |
| $\text{NO}_3 + \text{HI} \rightarrow \text{HNO}_3 + \text{I}$                        | $k = 1.3 \times 10^{-12} \exp(-1830/T)$                                                                     | Atkinson et al., 2007                    |      |
| $\text{I} + \text{NO}_2 \rightarrow \text{INO}_2$                                    | $k_0 = 3.0 \times 10^{-31} (T/300)^{-1.0}$<br>$k_\infty = 6.6 \times 10^{-11}$ , $F_c = 0.6$                | Sander et al., 2006                      |      |
| $\text{INO}_2 \rightarrow \text{I} + \text{NO}_2$                                    | $k = 0.14 \text{ s}^{-1}$ (at 268 K)                                                                        | Van den Bergh and Troe, 1976             | 4    |
| $\text{INO}_2 + \text{INO}_2 \rightarrow \text{I}_2 + 2\text{NO}_2$                  | $k = 4.7 \times 10^{-13} \exp(-1670/T)$                                                                     | Atkinson et al., 2007                    |      |
| $\text{I} + \text{NO} \rightarrow \text{INO}$                                        | $k_0 = 1.8 \times 10^{-32} (T/300)^{-1.0}$<br>$k_\infty = 1.7 \times 10^{-11}$ , $F_c = 0.6$                | Sander et al., 2006                      |      |
| $\text{INO} \rightarrow \text{I} + \text{NO}$                                        | $k = 0.087 \text{ s}^{-1}$ (at 268 K)                                                                       | Van den Bergh and Troe, 1976             | 4    |
| $\text{INO} + \text{INO} \rightarrow \text{I}_2 + \text{NO} + \text{NO}$             | $k = 8.4 \times 10^{-11} \exp(-2620/T)$                                                                     | Atkinson et al., 2007 or JPL             |      |
| $\text{IO} + \text{IO} \rightarrow 2\text{I} + \text{O}_2$                           | $k = 0.11 \times 5.4 \times 10^{-11} \exp(180/T)$                                                           | Atkinson et al., 2007                    | 5    |
| $\text{IO} + \text{IO} \rightarrow \text{I} + \text{OIO}$                            | $k = 0.38 \times 5.4 \times 10^{-11} \exp(180/T)$                                                           | Atkinson et al., 2007                    | 5    |
| $\text{IO} + \text{IO} \rightarrow \text{I}_2\text{O}_2$                             | $k = 0.51 \times 5.4 \times 10^{-11} \exp(180/T)$                                                           | Atkinson et al., 2007                    | 5    |
| $\text{IO} + \text{HO}_2 \rightarrow \text{HOI} + \text{O}_2$                        | $k = 1.4 \times 10^{-11} \exp(540/T)$                                                                       | Atkinson et al., 2007                    |      |
| $\text{OH} + \text{HOI} \rightarrow \text{IO} + \text{H}_2\text{O}$                  | $k = 1.0 \times 10^{-10}$                                                                                   |                                          | 6    |
| $\text{IO} + \text{CH}_3\text{O}_2 \rightarrow \text{CH}_3\text{O} + \text{IOO}$     | $k = 2.0 \times 10^{-12}$                                                                                   | Dillon et al., 2006                      | 7    |
| $\text{IO} + \text{NO} \rightarrow \text{I} + \text{NO}_2$                           | $k = 7.15 \times 10^{-12} \exp(300/T)$                                                                      | Atkinson et al., 2007                    |      |
| $\text{IO} + \text{NO}_2 \rightarrow \text{IONO}_2$                                  | $k_0 = 6.5 \times 10^{-31} (T/300)^{-3.5}$<br>$k_\infty = 7.6 \times 10^{-12} (T/300)^{-1.5}$ , $F_c = 0.6$ | Sander et al., 2006                      |      |
| $\text{IONO}_2 \rightarrow \text{IO} + \text{NO}_2$                                  | $k = 2.1 \times 10^{15} \exp(-13670/T)$                                                                     | Kaltsoyannis and Plane, 2008             | 8    |
| $\text{IO} + \text{NO}_3 \rightarrow \text{OIO} + \text{NO}_2$                       | $k = 9 \times 10^{-12}$                                                                                     | Dillon et al., 2008                      |      |
| $\text{I} + \text{NO}_3 \rightarrow \text{IO} + \text{NO}_2$                         | $k = 1 \times 10^{-12}$                                                                                     | Dillon et al., 2008                      |      |
| $\text{IO} + \text{BrO} \rightarrow \text{I} + \text{Br} + \text{O}_2$               | $k = 0.2 \times 1.5 \times 10^{-11} \exp(510/T)$                                                            | Atkinson et al., 2007                    | 9    |
| $\text{IO} + \text{BrO} \rightarrow \text{Br} + \text{OIO}$                          | $k = 0.8 \times 1.5 \times 10^{-11} \exp(510/T)$                                                            | Atkinson et al., 2007                    |      |
| $\text{IO} + \text{OIO} \rightarrow \text{I}_2\text{O}_5$                            | $k = 5 \times 10^{-11}$                                                                                     | Gomez-Martin et al., 2007                | 10   |
| $\text{OIO} + \text{OIO} \rightarrow \text{I}_2\text{O}_4$                           | $k = 1.5 \times 10^{-10}$                                                                                   | Gomez-Martin et al., 2007                | 10.1 |
| $\text{OIO} + \text{I}_2\text{O}_3 \rightarrow \text{PI}_1$                          | $k = 1.5 \times 10^{-10}$                                                                                   | Gomez-Martin et al., 2007                | 10.1 |
| $\text{OIO} + \text{I}_2\text{O}_4 \rightarrow \text{PI}_2$                          | $k = 1.5 \times 10^{-10}$                                                                                   | Gomez-Martin et al., 2007                | 10.1 |
| $\text{I}_2\text{O}_2 + \text{O}_3 \rightarrow \text{I}_2\text{O}_3 + \text{O}_2$    | $k = 1.0 \times 10^{-12}$                                                                                   | Saunders and Plane, 2005                 | 10.2 |
| $\text{I}_2\text{O}_3 + \text{O}_3 \rightarrow \text{I}_2\text{O}_4 + \text{O}_2$    | $k = 1.0 \times 10^{-12}$                                                                                   | Saunders and Plane, 2005                 | 10.2 |
| $\text{I}_2\text{O}_4 + \text{O}_3 \rightarrow \text{PI}_3$                          | $k = 1.0 \times 10^{-12}$                                                                                   | Saunders and Plane, 2005                 | 10.2 |
| $\text{I}_2\text{O}_2 \rightarrow \text{IO} + \text{IO}$                             | $k = 10 \text{ s}^{-1}$                                                                                     | Kaltsoyannis and Plane, 2008             | 10.3 |
| $\text{I}_2\text{O}_4 \rightarrow \text{OIO} + \text{OIO}$                           | $k = 0.1 \text{ s}^{-1}$                                                                                    | Kaltsoyannis and Plane, 2008             | 10.3 |
| $\text{NO} + \text{OIO} \rightarrow \text{IO} + \text{NO}_2$                         | $k = 1.1 \times 10^{-12} \exp(542/T)$                                                                       | Plane et al., 2006                       |      |
| $\text{OH} + \text{OIO} \rightarrow \text{PI}_4$ ( $\text{HIO}_3$ )                  | $k = 2.2 \times 10^{-10} \exp(243/T)$                                                                       | Plane et al., 2006                       | 11   |

|                                                   |                                         |                     |    |
|---------------------------------------------------|-----------------------------------------|---------------------|----|
| BrO + DMS → Br + DMSO                             | $k = 1.4 \times 10^{-14} \exp(950/T)$   | Sander et al., 2006 |    |
| Br + DMS → HBr + CH <sub>3</sub> SCH <sub>2</sub> | $k = 9.0 \times 10^{-11} \exp(-2390/T)$ | Sander et al., 2006 | 12 |
| IO + DMS → I + DMSO                               | $k = 1.2 \times 10^{-14}$               | Sander et al., 2006 |    |

1 Atkinson et al., 2007 = 2007 IUPAC Evaluation; Sander et al., 2006 = NASA/JPL Evaluation 15-06.

2 Supplementary Table S3. Heterogeneous reaction probabilities

3

| Species                                                                                            | Reaction Probability $\gamma$ | Reference                                                     |
|----------------------------------------------------------------------------------------------------|-------------------------------|---------------------------------------------------------------|
| HONO                                                                                               | 0.04                          | JPL 15-06                                                     |
| PNA                                                                                                | 0.1                           | JPL 15-06                                                     |
| HNO <sub>3</sub>                                                                                   | 0.1                           | JPL 15-06                                                     |
| N <sub>2</sub> O <sub>5</sub>                                                                      | 0.04                          | JPL 15-06                                                     |
| HO <sub>2</sub>                                                                                    | 0.2                           | Jacob, 2000                                                   |
| CH <sub>3</sub> O <sub>2</sub>                                                                     | 0.04                          | Jacob, 2000                                                   |
| HI                                                                                                 | 0.2                           | JPL 15-06                                                     |
| HBr                                                                                                | 0.2                           | JPL 15-06                                                     |
| HOI                                                                                                | 0.5                           | Mossinger and Cox, 2001 /<br>Braban et al. (2007) / JPL 15-06 |
| HOBr                                                                                               | 0.6                           | JPL 15-06                                                     |
| BrONO <sub>2</sub>                                                                                 | 0.2                           | JPL 15-06                                                     |
| IONO <sub>2</sub>                                                                                  | 0.2                           | Assumed as BrONO <sub>2</sub>                                 |
| INO <sub>2</sub>                                                                                   | 0.1                           | Assumed                                                       |
| BrNO <sub>2</sub>                                                                                  | 0.1                           | Assumed                                                       |
| IO                                                                                                 | 0.5                           | Assumed                                                       |
| OIO, I <sub>2</sub> O <sub>2</sub> , I <sub>2</sub> O <sub>3</sub> , I <sub>2</sub> O <sub>4</sub> | 1                             | Assumed                                                       |
| PI <sub>n</sub>                                                                                    | 1                             | Assumed                                                       |

4

5

6

7

1 **Notes to Halogen Reaction Scheme (Supplementary Tables 2, 3)**

2

3 Other reactions considered, but discounted as their effects were found to be negligible for  
4 this environment, were :

5

6 -Termolecular I atom recombination

7 -Halogen atom / molecule reactions (I + Br<sub>2</sub>, Br + I<sub>2</sub>, I + IBr, Br + IBr)

8 -Halogen atom / halogen monoxide reactions (I + BrO, Br + IO)

9 -Oxygen atom / halogen reactions (O + I<sub>2</sub>, O + Br<sub>2</sub>, O + IO, O + BrO)

10 -Halogen monoxide / ozone reactions (IO + O<sub>3</sub>, BrO + O<sub>3</sub>)

11

12 **Specific Notes**

13

14 1: OH + HOBr – Rate constant estimated with reference to OH + HOCl, O + HOCl and O +  
15 HOBr.

16

17 2: Temperature-dependent kinetics for BrO + CH<sub>3</sub>O<sub>2</sub> taken from Enami et al. (2007);  
18 products assumed to be HOBr + CH<sub>2</sub>O<sub>2</sub> following Aranda et al. (1997). Within the model  
19 CH<sub>2</sub>O<sub>2</sub> dissociates to CO + H<sub>2</sub>O (Mariq et al., 1994).

20

21 3: I<sub>2</sub>+NO<sub>3</sub>. Products assumed to be I+IONO<sub>2</sub> following Atkinson et al. (2007) on enthalpy  
22 arguments. Effect of alternative product channel (IO + INO<sub>2</sub>, as adopted by Saiz-Lopez et  
23 al., 2008) considered in sensitivity study.

24

25 4: INO and INO<sub>2</sub> thermal decomposition calculated via the formation rate constants given,  
26 plus temperature-dependent equilibrium constant expressions from van den Burgh and Troe,  
27 1976:  $K_{eq}(I + NO \leftrightarrow INO) = 10^{-5.70} \times \exp(9160/T)$  and  $K_{eq}(I + NO_2 \leftrightarrow INO_2) = 10^{-$   
28  $6.43} \times \exp(9560/T)$ , both in atm<sup>-1</sup>.

1

2 5: IO + IO: Overall rate constant and OIO+I channel from Atkinson et al. (2007); branching  
3 ratio for 2I + O<sub>2</sub> / I<sub>2</sub>O<sub>2</sub> channels from Bloss et al. (2001). See also comments below (note  
4 10.3).

5

6 6: OH + HOI – Rate constant estimated with reference to OH + HOCl, O + HOCl and O +  
7 HOBr.

8

9 7: Base-case for the IO + CH<sub>3</sub>O<sub>2</sub> reaction is “slow” kinetics ( $k = 2 \times 10^{-12}$ ; Dillon et al., 2006)  
10 and formation of CH<sub>3</sub>O + IOO (i.e. the CH<sub>3</sub>OOOI intermediate, likely decomposing to  
11 CH<sub>3</sub>O + IOO and hence HCHO + HO<sub>2</sub> + I + O<sub>2</sub> in the atmospheric boundary layer) with unit  
12 yield. Sensitivity studies described in the text consider the potential impact of a higher rate  
13 constant (e.g. Bale et al., 2005; Enami et al., 2007) and alternative product channels, e.g. via  
14 the CH<sub>3</sub>OOIO channel to CH<sub>3</sub>O + OIO (Drougas and Kosmas, 2007).

15

16 8 Thermal decomposition rate reported by Kaltsoyannis and Plane (2008) adopted; this is  
17 based upon revised RRKM analysis coupled to laboratory kinetic data for the forward  
18 reaction obtained by Allen and Plane (2002), and supersedes the decomposition rate  
19 determined in a similar manner in the earlier paper.

20

21 9: Branching ratio for IO + BrO from Atkinson et al. (2007) in combination with Rowley et  
22 al. (2001); note approach adopted neglects possible increase in atomic channels at reduced  
23 temperature.

24

25 10: *Higher Iodine Oxides*

26 In addition to thermal reactions with other chemical families (NO<sub>x</sub>, BrO<sub>x</sub> etc.), iodine oxides  
27 are thought to polymerise through a series of addition reactions potentially involving IO,  
28 OIO, I<sub>2</sub>O<sub>2</sub> and higher iodine oxides. Considerable laboratory evidence exists for the near-  
29 gas kinetic removal of OIO in fast iodine kinetics studies (e.g. Bloss et al., 2001; Ingham et  
30 al., 2000), and also for the formation of particles of bulk composition I<sub>2</sub>O<sub>5</sub> / I<sub>4</sub>O<sub>9</sub> (e.g.

1 Burkholder et al., 2004; McFiggans et al., 2004), but details of the nucleation process are far  
2 from understood. In this paper, we adopt an iodine source selected to replicate the observed  
3 levels of IO subject to the chemical mechanism, which must therefore include a  
4 representation of the process for the removal of active iodine into the condensed phase.  
5 Whilst given our current level of understanding any specific mechanism is unlikely to be  
6 totally correct, the modelled effects of iodine chemistry upon HO<sub>x</sub> and NO<sub>x</sub> (the focus of the  
7 paper) should be robust as the levels of IO (which effectively constrains most of the other  
8 iodine-inorganic chemistry interactions) match those observed. The details of the  
9 mechanism adopted for removal of active iodine into the condensed phase will however  
10 impact upon the iodine source required to generate a given level of IO; this is considered  
11 further in the sensitivity studies.

12

13 Here we adopt a mechanism drawn from recent laboratory and theoretical studies, in which  
14 two routes to higher iodine oxides are considered: Sequential addition of ozone to  
15 I<sub>2</sub>O<sub>2</sub>/I<sub>2</sub>O<sub>3</sub>/I<sub>2</sub>O<sub>4</sub> (Saunders and Plane, 2005), and polymerisation of OIO (Gomez-Martin et al.,  
16 2007). We consider any species above I<sub>2</sub>O<sub>4</sub> to be thermally and photolytically stable on the  
17 timescale of these simulations, i.e. to irreversibly incorporate into particulate iodine: PI<sub>1</sub>, PI<sub>2</sub>  
18 and PI<sub>3</sub>, which may in reality be identified with I<sub>3</sub>O<sub>5</sub> or I<sub>2</sub>O<sub>5</sub> + I, I<sub>3</sub>O<sub>6</sub> or I<sub>2</sub>O<sub>5</sub> + IO, and  
19 I<sub>2</sub>O<sub>5</sub>+O<sub>2</sub> respectively. We also consider the thermal stability of I<sub>2</sub>O<sub>2</sub>, I<sub>2</sub>O<sub>3</sub> and I<sub>2</sub>O<sub>4</sub>, based  
20 upon the calculations of Kaltsoyannis and Plane (2008), and the photolysis of OIO, I<sub>2</sub>O<sub>2</sub>,  
21 I<sub>2</sub>O<sub>3</sub> and I<sub>2</sub>O<sub>4</sub> as described above. (These assumptions are explored further in the sensitivity  
22 study).

23

24 10.1 Gomez-Martin et al. (2007) infer limits for an association reaction between OIO and  
25 small (n = 1 - 4) OIO polymers of  $(1.2 - 3) \times 10^{-10} \text{ molec}^{-1} \text{ cm}^3 \text{ s}^{-1}$ . Here we choose a mid-  
26 range value of  $1.5 \times 10^{-10} \text{ molec}^{-1} \text{ cm}^3 \text{ s}^{-1}$ , and apply this to the reaction of OIO with itself,  
27 I<sub>2</sub>O<sub>3</sub> and I<sub>2</sub>O<sub>4</sub>.

28

29 10.2 : Oxidation of I<sub>2</sub>O<sub>2</sub>, I<sub>2</sub>O<sub>3</sub> and I<sub>2</sub>O<sub>4</sub> by ozone. The rate constant adopted ( $1 \times 10^{-12} \text{ molec}^{-1}$   
30  $\text{ cm}^3 \text{ s}^{-1}$ ) is based upon the analysis of Saunders and Plane (2005), although recent  
31 calculations (Kaltsoyannis and Plane, 2008) indicate that the reaction may be slower, and the

1 calculated short thermal lifetime for I<sub>2</sub>O<sub>2</sub> indicates that IO/OIO recombination is probably  
2 the dominant route to I<sub>2</sub>O<sub>3</sub> / I<sub>2</sub>O<sub>4</sub> in the atmosphere).

3

4 10.3 Kaltsoyannis and Plane calculate the lifetimes of I<sub>2</sub>O<sub>2</sub>, I<sub>2</sub>O<sub>3</sub> and I<sub>2</sub>O<sub>4</sub> with respect to  
5 thermal decomposition to be of the order of 0.1, 10<sup>8</sup> and 10 seconds respectively (293 K);  
6 appropriate (temperature-independent) decomposition rates for I<sub>2</sub>O<sub>2</sub> and I<sub>2</sub>O<sub>4</sub> are therefore  
7 included. I<sub>2</sub>O<sub>2</sub> is assumed to be IOIO; IOOI is found to dissociate promptly.

8

9 11: The reaction of OIO with OH is assumed to form HIO<sub>3</sub>, which is stable (Plane et al.,  
10 2006), and is assumed to contribute to particulate iodine: PI<sub>4</sub>.

11

12 12: DMS-Br adduct channel neglected.

13

14 In addition to the halogen and DMS scheme, the MCM (version 3.1) kinetics describing the  
15 fate of O(<sup>1</sup>D) atoms were updated to the JPL (Sander et al., 2006) rate constants :

|                                                                           |                                        |                     |
|---------------------------------------------------------------------------|----------------------------------------|---------------------|
| O( <sup>1</sup> D) + O <sub>2</sub> → O( <sup>3</sup> P) + O <sub>2</sub> | $k = 3.3 \times 10^{-11} \exp(55/T)$   | Sander et al., 2006 |
| O( <sup>1</sup> D) + N <sub>2</sub> → O( <sup>3</sup> P) + N <sub>2</sub> | $k = 2.15 \times 10^{-11} \exp(110/T)$ | Sander et al., 2006 |
| O( <sup>1</sup> D) + H <sub>2</sub> O → OH + OH                           | $k = 1.63 \times 10^{-10} \exp(60/T)$  | Sander et al., 2006 |

16
